# Supplementary material for: COVID-19 Vaccination Around ICI Initiation and Survival in Lung, Kidney, and Melanoma
Source: Research Square preprint supplement (doi:10.21203/rs.3.rs-8379790/v1), 2025-12-23
Supplement: Supplementary file 1 [file 60267e047f4761c690e8d16c.docx]

**Methods**

**Design of the Target Trial**

The hypothetical RCT would include adults (≥18 years) with a primary diagnosis of lung, melanoma, or kidney cancer before initiating first-line ICI therapy on or after September 2, 2020, corresponding to 100 days before the first COVID-19 mRNA vaccines became available in the United States (Extended Data Table 1). At ICI initiation (time zero), participants would be assigned to one of two strategies: (1) receipt of ≥1 COVID-19 mRNA vaccine within 100 days of ICI initiation, or (2) no vaccination within this window. Follow-up would continue until death, loss to follow-up, or the administrative end of the study. The primary outcome would be overall survival (OS); secondary outcomes would include treatment-free survival (TFS), defined as time to initiation of subsequent systemic therapy or death.

**Data Source**

We used data from the TriNetX Linked network1, which includes EHR-derived clinical variables, structured medication and procedure records, unstructured text processed by natural language processing, and linked claims data. Data for this study were extracted on April 23rd, 2025. The study followed strengthening the reporting of observational studies in epidemiology (STROBE) guidelines2.

**Design of the Emulated Trial**

To emulate the target RCT, we identified adults (≥18 years) in TriNetX with a primary diagnosis of lung, melanoma, or kidney cancer before ICI initiation who received first-line ICI therapy between September 2, 2020, and November 8, 2024. Cancer diagnoses were defined using International Classification of Diseases (ICD-10) codes, including lung cancer (ICD-10: C34, malignant neoplasm of bronchus and lung), melanoma (ICD-10: C43, malignant melanoma of skin), and kidney cancer (ICD-10: C64, malignant neoplasm of kidney, except renal pelvis). First-line systemic treatment was defined as the initial systemic therapy for metastatic disease, with no prior record of systemic therapy, as captured in structured medication orders, pharmacy records, or oncology treatment logs. A total of 10 ICIs were included including PD-1 inhibitors (nivolumab, pembrolizumab, cemiplimab, dostarlimab), PD-L1 inhibitors (atezolizumab, avelumab, durvalumab), CTLA-4 inhibitors (ipilimumab, tremelimumab), and the LAG-3 inhibitor relatlimab, as detailed in the Extended Data Table 2. This window ensured overlap with documented COVID-19 mRNA vaccination within 100 days before or after ICI initiation (vaccine data available from December 2020 through February 2025) and allowed inclusion of unvaccinated comparators. Time zero was the earliest first-line ICI prescription date (ICI initiation or index date). Patients were classified into the vaccination arm if they received a COVID-19 mRNA vaccine from 100 days before to 100 days after ICI initiation and into the no-vaccination arm if they did not receive a vaccine in this window. Detailed target trial emulation steps are described below.

**Outcomes**

Overall survival was defined as the time from ICI initiation to death from any cause. Mortality in TriNetX is ascertained from multiple sources, including EHRs from participating health systems, obituary records, and the Social Security Death Index1. Patients who were alive at the time of TriNetX data extraction or lost to follow-up were censored at the date of their last recorded encounter. TFS was defined as the time from first-line ICI initiation to the earliest of initiation of subsequent systemic therapy (first prescription after a >90-day3-6 gap from that last prescription) or death7. The primary outcome was 3-year OS, and the secondary outcome was 3-year TFS; 1-year and 2-year OS and TFS were prespecified exploratory outcomes.

**Covariates**

Baseline covariates included age, sex, race and ethnicity, marital status, metastatic status at ICI initiation, comorbidity burden (Charlson Comorbidity Index), ICI drug class (anti–PD-1 vs anti–PD-L1), concurrent chemotherapy, and pandemic period at ICI initiation (pandemic vs post-pandemic, defined as after May 10, 20238). Concurrent chemotherapy was defined as the presence of any of 21 prespecified chemotherapy agents (Extended Data Table 2) administered within ±1 month of ICI initiation. ICI drug class (anti–PD-1 vs anti–PD-L1) was defined according to the backbone checkpoint inhibitor and applied both to monotherapy and to combination regimens (e.g., PD-1 plus anti–CTLA-4 in melanoma or PD-1 plus targeted therapy). Vaccination characteristics included vaccine brand; number of shots (including primary series and boosters) received in the –100 to 100 day window around ICI initiation; timing relative to ICI initiation (before vs. after); and a more granular categorization of vaccination dates within the –100 to –30, –30 to 0, 0 to 30, and 30 to 100 day windows around ICI initiation.

**Statistical Analysis**

We conducted a TTE9,10 using a clone-censor-weight approach to align eligibility, treatment strategies, time zero, and to mitigate immortal-time bias11 due to variation in vaccination timing. Clones were censored when observed vaccination deviated from the assigned strategy. Stabilized inverse probability of censoring weights (IPCW) were used to adjust for informative censoring, with weights estimated from logistic regressions with covariates including age, race, marital status, metastatic status, comorbidity burden, ICI drug class, and concurrent chemotherapy at ICI initiation10. Weighted pooled logistic regression models incorporating flexible time terms were used to estimate survival probabilities under each strategy. This approach has been shown to be better suited for time-to-event analyses using IPCW, as it avoids reliance on a constant hazard ratio and provides more robust estimates in the TTE framework10. Adjusted hazard ratios (aHRs), restricted mean survival time (RMST) and risk ratios at 1, 2, and 3 years were derived from model-based survival curves. Confidence intervals and p-values were obtained using bootstrap resampling12. Statistical significance for the primary outcome was assessed using a Bonferroni-adjusted α of 0.016. Subgroup analyses were prespecified for age, sex, pandemic period at ICI initiation (during vs. post-pandemic), metastatic status, concurrent chemotherapy, PD-1 vs. PD-L1 ICI class, vaccination timing, vaccine brand, and number of shots. Sensitivity analyses included extending the vaccination window to 200 days and evaluating influenza vaccination as a negative control.

**Target Trial Emulation Steps**

The TTE analyses requires addressing immortal time bias11 arising because vaccination occurs at a different time from time zero, as well as confounding bias11 due to nonrandomized treatment assignment. We applied the TTE framework described by Hernàn and colleagues9,10. Each eligible individual was “cloned” into two copies at time zero, one assigned to the vaccination strategy and one to the no-vaccination strategy, ensuring balanced baseline characteristics across strategies. During follow-up, each clone was artificially censored at the time when the patient’s observed treatment deviated from the assigned strategy (e.g., censoring the no-vaccination clone at vaccine initiation). This approach ensures that eligibility, start of follow-up, and assignment to a treatment strategy are aligned and that patients can be represented in both arms until treatment assignment can be determined10,13. In current TTE, vaccinations occurring within −100 to 0 day of ICI initiation were treated as baseline vaccinations to maintain proper temporal alignment between exposure and follow-up. Because the cloning procedure requires censoring one clone when a patient’s observed treatment no longer matches the assigned strategy, we applied stabilized inverse probability of censoring weights (IPCW). These weights adjust for the induced articficial censoring so that patients who remain under follow-up continue to represent the full study population. We estimated the IPCW weights using pooled logistic regression on biweekly person-period data, including time since ICI initiation (using natural cubic splines), age, race, ethnicity, marital status, ICI drug class (anti–PD-1/PD-L1), metastatic status, and chemotherapy use.

The outcome model was a weighted pooled logistic regression including treatment arm, natural cubic splines for time, and their interactions to allow for time-varying treatment effects. We obtained estimated survival probabilities for each 14 days under each arm strategy and estimated the hazard ratio (HR) and restricted mean survival time (RMST) at 1, 2 and 3 years respectively. The pooled logistic regression model flexibly captures changes in the baseline hazard and allows time-varying treatment effects. Confidence intervals and p-values were obtained using patient-level bootstrap resamples. In each bootstrap iteration, both the IPCW and outcome models were refitted to fully account for sampling variability in the weighting and outcome estimation steps.

In this section, we provide steps of the design and statistical analysis methodology of emulated trials in the presence of immortal time bias. Specify the trials design, including eligibility criteria, treatment assignment, outcome and follow-up time, causal contrast, and statistical analysis (Extended Data Table 1).

1. Expand the wide data into a long format such that each patient has multiple rows, and each row represents 14 days. For patients who died, the last row is the death date. For other patients, the last row is the last encounter date.
2. Cloning: For each patient, a clone is created with the only change being the treatment assignment. This doubles the size of the data. By doing this, the baseline confounders are balanced.
3. Artificial censoring of the clones: The clones of patients are artificially censored when their actual treatment received deviated from the planned protocol. Specifically, (i) the clones of patients who actually received the treatment in arm 0 are artificially censored at the date of Covid-19 vaccine initiation; (ii) the clones of patients who actually did not receive the treatment in arm 1 are artificial censored at the end of the 100-day grace period. An artificial censoring indicator, Ct, is therefore created.
4. Artificial censoring model: the rationale is to up-weight patients in the risk. We fit a pooled logistic regression model to the expanded dataset containing clones from both treatment strategies:

where is the censoring indicator with 1 being censored at time t; denotes the baseline confounders; T is the minimum of time to death or last follow-up date post ICI initiation (time zero); indicator A denotes the group of patients with clones receiving control (A=0) or treatment (A=1); and is the natural spline with 6 degrees of freedom.

1. IPCW: for each subject (including clones) in a risk set at time t, we weight they by an estimate of
2. Stabilized IPCW: weight each subject (including clones) in risk set at time t by an estimator of

The logistic models for the denominators only include an intercept, treatment A, and .

1. Specify stabilized IPCW in each arm. After grace period, . Trim extreme weights.
2. Outcome model: Fit pooled logistic regression (quasibinomial family) to the double-sized data with clones with each row weighted by .

where A is the treatment indicator, t is the time post ICI initiation, and is the natural spline with 2 degrees of freedom.

1. Survival curve: estimated the predicted values from the outcome model, and compute 95% bootstrap confidence intervals (500 re-samplings) to account for both weighting estimation and inflation of the sample size.

**Estimation of the Hazard Ratio and P-values in the TTE framework**

To compare time-to-event outcomes between the treatment and control groups, we estimated the hazard ratio using a Mantel–Haenszel (MH) approach based on reconstructed risk sets and event counts at each observed event. This approach yields an estimate equivalent to a Cox proportional hazards model within the TTE framework. The steps are below:

*Step 1. Reconstructing the number at risk and number of events at each time point*

Let the distinct biweekly times be , and let denote the TTE model-implied (estimated) cumulative risk in arm at time . The corresponding survival function is . For each interval , the conditional probability of experiencing the event in that interval, among those alive and uncensored at , is

We combined these interval-specific probabilities with the observed numbers at risk in each arm at the start of each interval, , to obtain expected event counts: , where and denote, respectively, the event counts in the control and treatment arms.

*Step 2. Mantel–Haenszel hazard ratio*

Using the reconstructed interval-specific event counts and risk sets, we then computed a Mantel–Haenszel–type pooled hazard ratio. Let denote numbers at risk in the control and treatment arms at the start of interval denote the corresponding interval event counts, and denote total number at risk. The pooled HR is

Intuitively, each follow-up interval contributes a weighted comparison of event counts between arms, with weights proportional to the sizes of the risk sets. The p-values are calculated using 500 bootstraps on log of HR estimates.

**Subgroup Analysis in the TTE framework**

Each subgroup underwent a separate target trial emulation following Steps A1 and A2, restricted to vaccinated and non-vaccinated patients who met the specific subgroup criteria. For vaccination-specific covariates (timing, brand, window, doses), each vaccinated subgroup had a separate target trial emulation using a shared non-vaccinated control group.

Reference

1. TriNetX. TriNetX: Real-world data for the life sciences and healthcare.

2. STROBE. STROBE guideline. Vol. 12/05/2025.

3. Obeng, D.*, et al.* Assessment of the Application of a 90-Day-Gap Rule for Mitigating Frontline Treatment Sequence Misclassification in Electronic Health Records in the United States. in *PHARMACOEPIDEMIOLOGY AND DRUG SAFETY*, Vol. 33 604-604 (WILEY 111 RIVER ST, HOBOKEN 07030-5774, NJ USA, 2024).

4. Hess, L.M., Li, X., Wu, Y., Goodloe, R.J. & Cui, Z.L. Defining treatment regimens and lines of therapy using real-world data in oncology. *Future Oncol* **17**, 1865-1877 (2021).

5. Sun, L., Cohen, R.B., D’Avella, C.A., Singh, A.P., Schoenfeld, J.D. & Hanna, G.J. Overall survival, treatment duration, and rechallenge outcomes with ICI therapy for recurrent or metastatic HNSCC. *JAMA network Open* **7**, e2428526-e2428526 (2024).

6. Bains, S., Kalsekar, A., Amiri, K.I. & Weiss, J. Real-world treatment patterns and outcomes among patients with metastatic NSCLC previously treated with programmed cell death protein-1/programmed death-ligand 1 inhibitors. *JTO Clinical and Research Reports* **3**, 100275 (2022).

7. Regan, M.M.*, et al.* Treatment-free Survival after Immune Checkpoint Inhibitor Therapy versus Targeted Therapy for Advanced Renal Cell Carcinoma: 42-Month Results of the CheckMate 214 Trial. *Clin Cancer Res* **27**, 6687-6695 (2021).

8. CDC. End of the Federal COVID-19 Public Health Emergency (PHE) Declaration. (2023).

9. Hernán, M.A. & Robins, J.M. Using big data to emulate a target trial when a randomized trial is not available. *American journal of epidemiology* **183**, 758-764 (2016).

10. Hernán, M.A., Sauer, B.C., Hernández-Díaz, S., Platt, R. & Shrier, I. Specifying a target trial prevents immortal time bias and other self-inflicted injuries in observational analyses. *Journal of clinical epidemiology* **79**, 70-75 (2016).

11. Ahlbom, A. Modern epidemiology, TL lash, TJ VanderWeele, s haneuse, KJ rothman. wolters kluwer, 2021. *European journal of epidemiology* **36**, 767-768 (2021).

12. Hernan, M.A. & Robins, J.M. *Causal Inference: What If*, (CRC Press, 2025).

13. Sun, S.*, et al.* Benzodiazepine initiation and the risk of falls or fall-related injuries in older adults following acute ischemic stroke. *Neurology: Clinical Practice* **15**, e200452 (2025).
