# Supplementary material for: COVID-19 Vaccination Around ICI Initiation and Survival in Lung, Kidney, and Melanoma
Source: Research Square preprint supplement (doi:10.21203/rs.3.rs-8379790/v1), 2025-12-23
Supplement: Supplementary file 2 [file 9704c322e66398b8c3ba26d0.docx]

**Extended Data**

**Extended Data Figures and Tables**

- **Extended Data Figure 1. Flow diagram of study cohort selection for the target trial emulation**
- **Extended Data Figure 2. Unadjusted overall survival and treatment-free survival curves by COVID-19 vaccine arms**
- **Extended Data Figure 3. Unadjusted overall survival and treatment-free survival curves by COVID-19 vaccine initiation strategy and timing**
- **Extended Data Figure 4. Adjusted subgroup analyses of overall survival and treatment-free survival by COVID-19 vaccination vs no-vaccination strategy, stratified by pandemic and post-pandemic**
- **Extended Data Figure 5. Adjusted overall survival curves by COVID-19 vaccination vs no-vaccination strategy within 200 days of ICI initiation.**
- **Extended Data Figure 6. Adjusted overall survival curves by Flu vaccination vs no-vaccination strategy within 100 days of ICI initiation.**
- **Extended Data Table 1. Description of a target randomized control trial and the corresponding trial emulation**
- **Extended Data Table 2. List of query codes for cancer diagnoses, immunotherapy, chemotherapy, COVID-19 vaccination, influenza vaccination, and comorbidity index.**
- **Extended Data Table 3: Patients baseline characteristics by cancer type and by vaccination arms**
- **Extended Data Table 4. Unadjusted one-year, two-year and three-year restricted mean survival time difference (ΔRMST), risk ratio (RR) and hazard ratio (HR) for the vaccination vs no-vaccination strategy.**
- **Extended Data Table 5. Adjusted restricted mean survival time difference (ΔRMST) and risk ratio (RR) for the vaccination vs no-vaccination strategy across cancer types estimated from the target trial emulation at one-, two- and three-years.**
- **Extended Data Table 6. Variation in ICI treatments between vaccinated and unvaccinated groups by cancer type.**

**Extended Data Figure 1. Flow diagram of study cohort selection for the target trial emulation.**


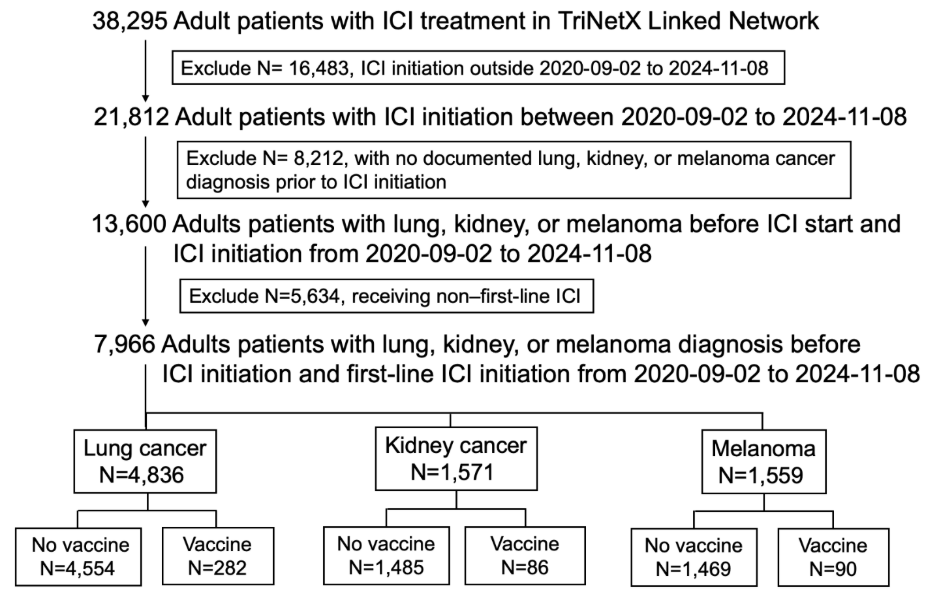


Among the 38,295 adult patients with Immune Checkpoint Inhibitor (ICI) treatment in TriNetX Linked Network, encompassing 29 U.S. health systems and representing contemporary oncology practice from 2015–2025 (data extracted on Apr 2025), we excluded 1) 16,483 individuals who initiated ICI treatment outside 2020-09-02 to 2024-11-08; 2) 8,212 participants with no documented lung, kidney, or melanoma cancer diagnosis prior to ICI initiation; and 3) 5,634 participants who received non-first-line ICI treatment. The main analysis cohort included 7,966 adults with lung, kidney, or melanoma cancer diagnosis before ICI initiation who received first-line ICI therapy between September 2, 2020, and November 8, 2024. Among these patients, 4,836 had lung cancer diagnosis, 1,571 had kidney cancer and 1,559 had melanoma. Among 4,836 lung cancer participants, 282 received a COVID-19 mRNA vaccine within the 100-day grace period before or after ICI initiation (vaccinated group), and 4,554 did not (unvaccinated group). For kidney cancer, 86 participants were in the vaccinated group and 1,485 in the unvaccinated group; for melanoma, 90 were vaccinated and 1,469 were unvaccinated.

**Extended Data Figure 2. Unadjusted overall survival and treatment-free survival curves by COVID-19 vaccine arms**


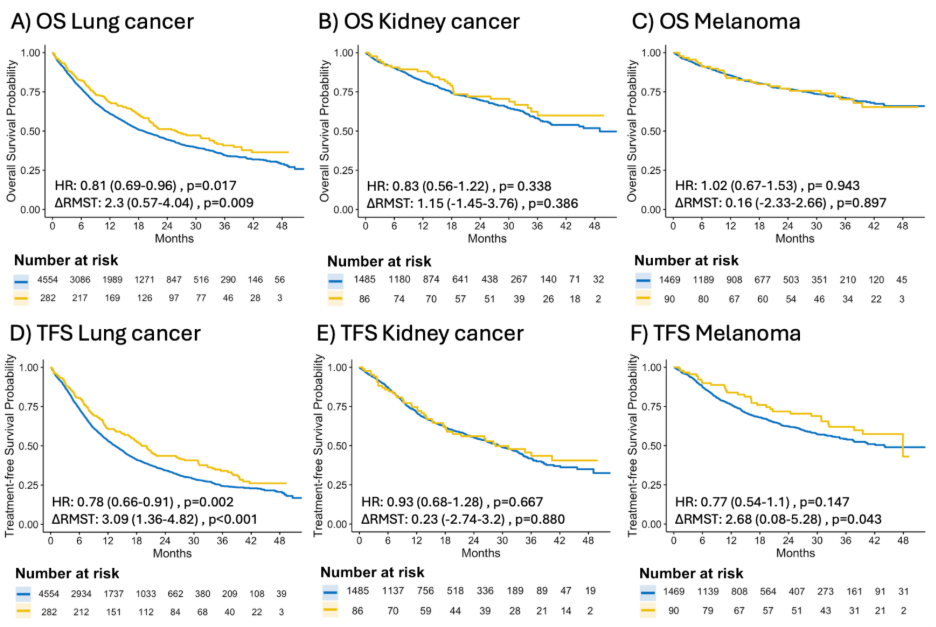


The outcomes included A-C) overall survival probability and D-F) treatment-free survival probability, with A) and D) lung cancer, B) and E) kidney cancer, and C) and F) melanoma. The x-axis of each figure was the month since first-line ICI initiation. The curves were colored by the treatment group (blue: no vaccine and yellow: vaccine). The number of participants at risk at each time point were listed below each figure. The hazard ratio (HR; vaccinated vs. unvaccinated) and the 3-year restricted mean survival time difference (ΔRMST; vaccinated minus unvaccinated), along with corresponding p-values, were estimatedThe figures were generated by Simon Mackuh Survival curves to accommodate time-varying vaccination dates within 100 days of ICI initiation.

**Extended Data Figure 3. Unadjusted overall survival and treatment-free survival curves by COVID-19 vaccine initiation strategy and timing.**

**
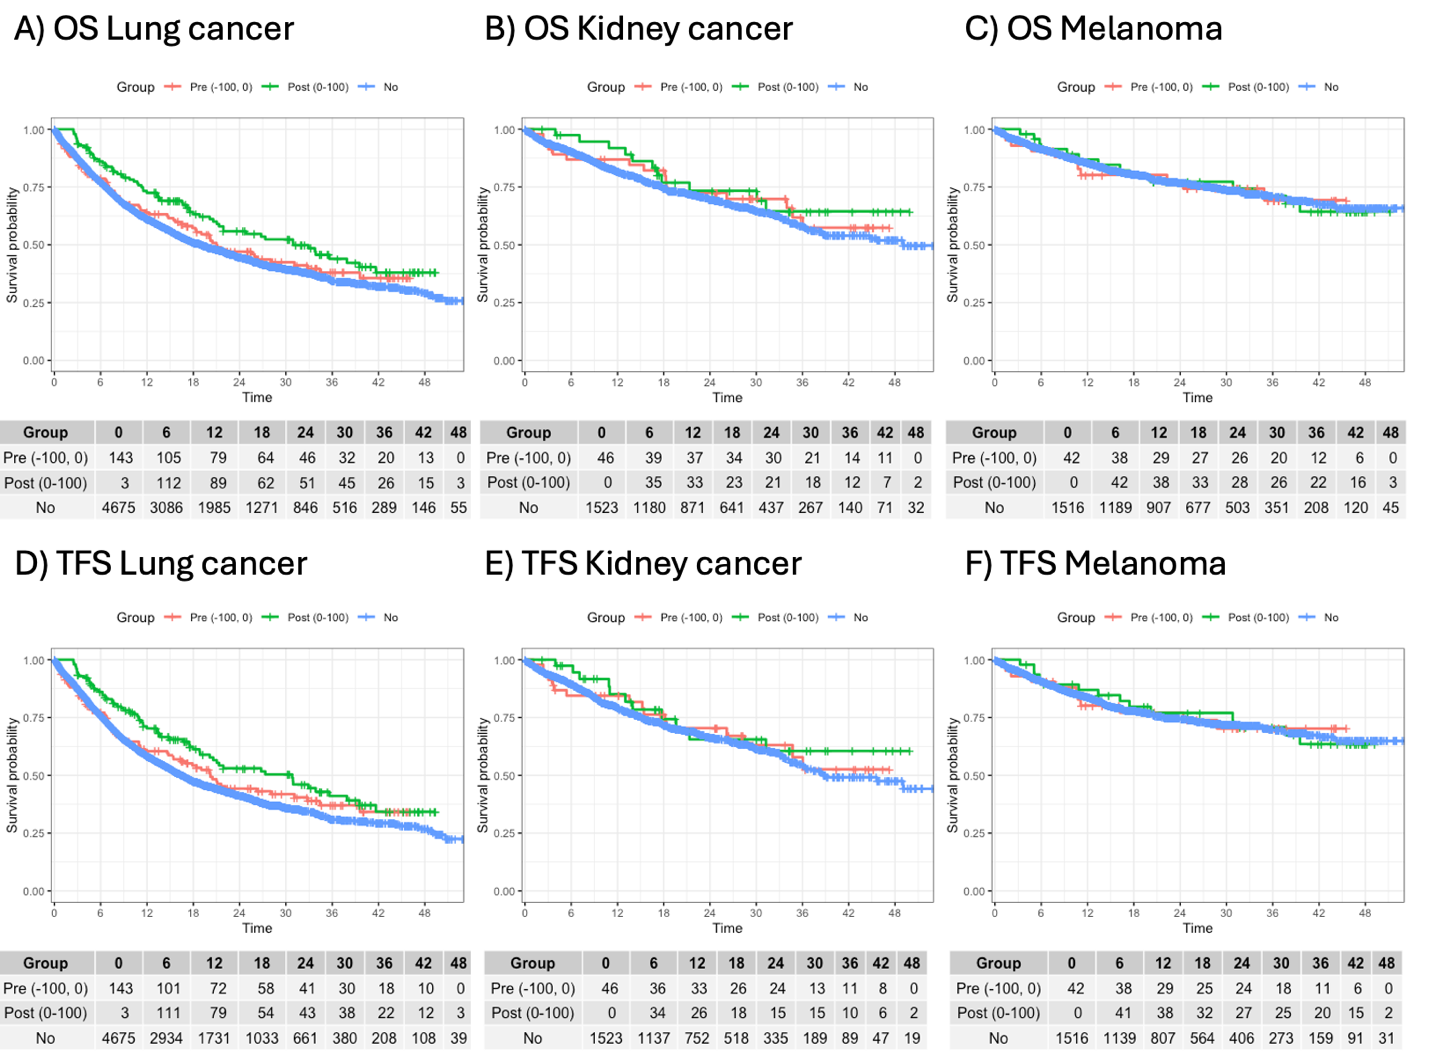
**

The outcomes included observed A-C) overall survival probability and D-F) treatment-free survival probability, with A) and D) lung cancer, B) and E) kidney cancer, and C) and F) melanoma. The x-axis of each figure was the month since first-line ICI initiation. The curves were colored by the COVID-19 vaccine initiation strategy and timing (blue: no vaccine, red: vaccine within 100 days before ICI initiation and green: vaccine within 100 days after ICI initiation). The number of participants at risk at each time point were listed in the table below each figure. The figures were generated by Simon Mackuh Survival curves to accommodate time-varying vaccination dates between 0-100 days post ICI initiation.

**Extended Data Figure 4. Adjusted subgroup analyses of overall survival and treatment-free survival by COVID-19 vaccination vs no-vaccination strategy, stratified by pandemic and post-pandemic**


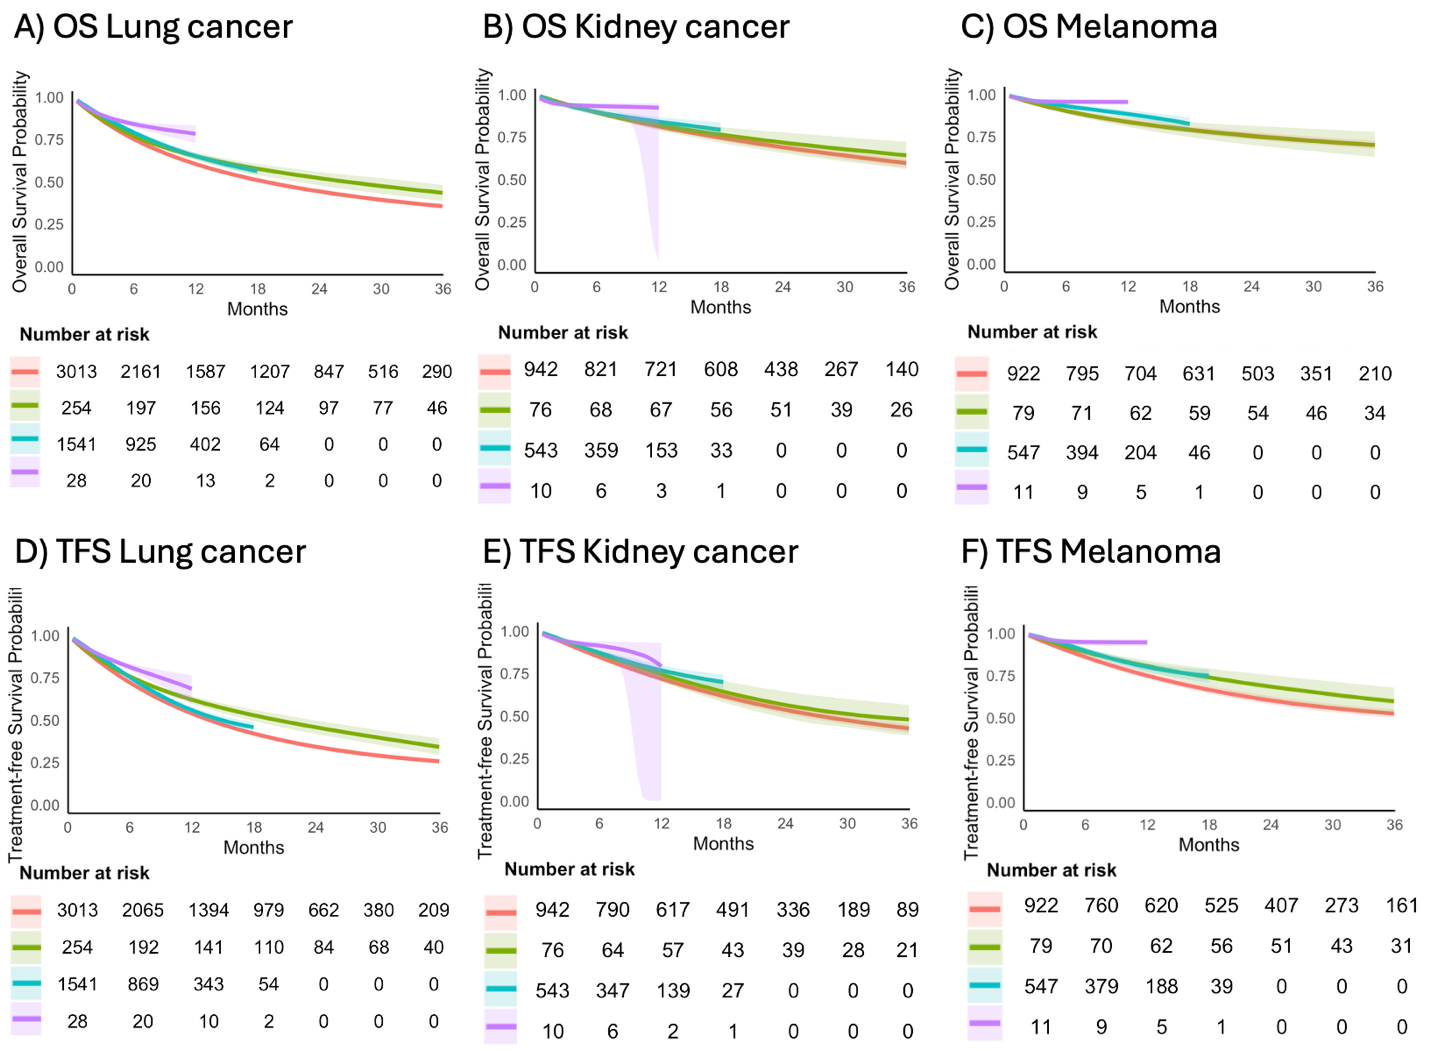


The outcomes included A-C) overall survival probability and D-F) treatment-free survival probability, with A) and E) lung cancer, B) and F) kidney cancer, and C) and F) melanoma. The x-axis of each figure was the month since first-line ICI initiation. The curves were colored by the COVID-19 vaccine initiation strategy and pandemic (red: pandemic and no vaccine, green: pandemic and vaccine, blue: post-pandemic and no vaccine, and purple: post-pandemic and vaccine). The overall survival and treatment-free survival probabilities were estimated in the target trial emulation. Shaded areas represented the 95% confidence intervals constructed using bootstrap replications. The number of participants at risk at each time point were listed below each figure.

**Extended Data Figure 5. Adjusted overall survival curves by COVID-19 vaccination vs no-vaccination strategy within 200 days of ICI initiation.**


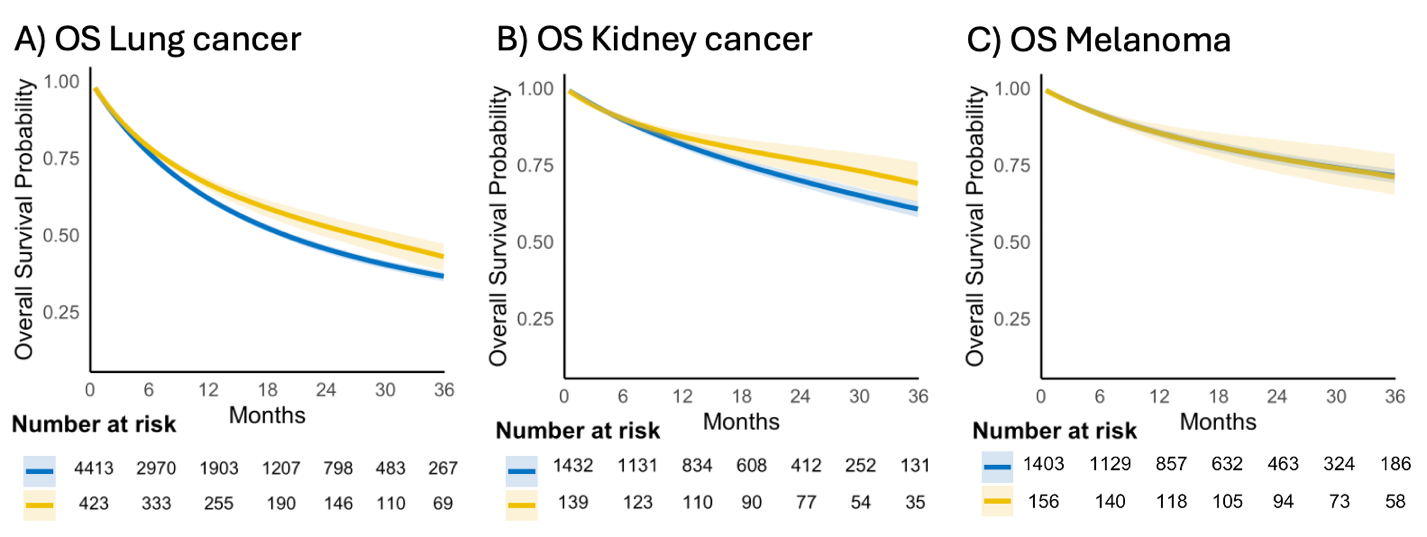


The outcomes included overall survival for A) lung cancer, B) kidney cancer, and C) melanoma. The x-axis of each figure was the month since first-line ICI initiation. The curves were colored by the COVID-19 vaccine initiation strategy within 200 days of ICI initiation (blue: no vaccine and yellow: vaccine). The overall survival probabilities were estimated in the target trial emulation. Shaded areas represented the 95% confidence intervals constructed using bootstrap replications. The number of participants at risk at each time point were listed below each figure.

**Extended Data Figure 6. Adjusted overall survival curves by Flu vaccination vs no-vaccination strategy within 100 days of ICI initiation.**


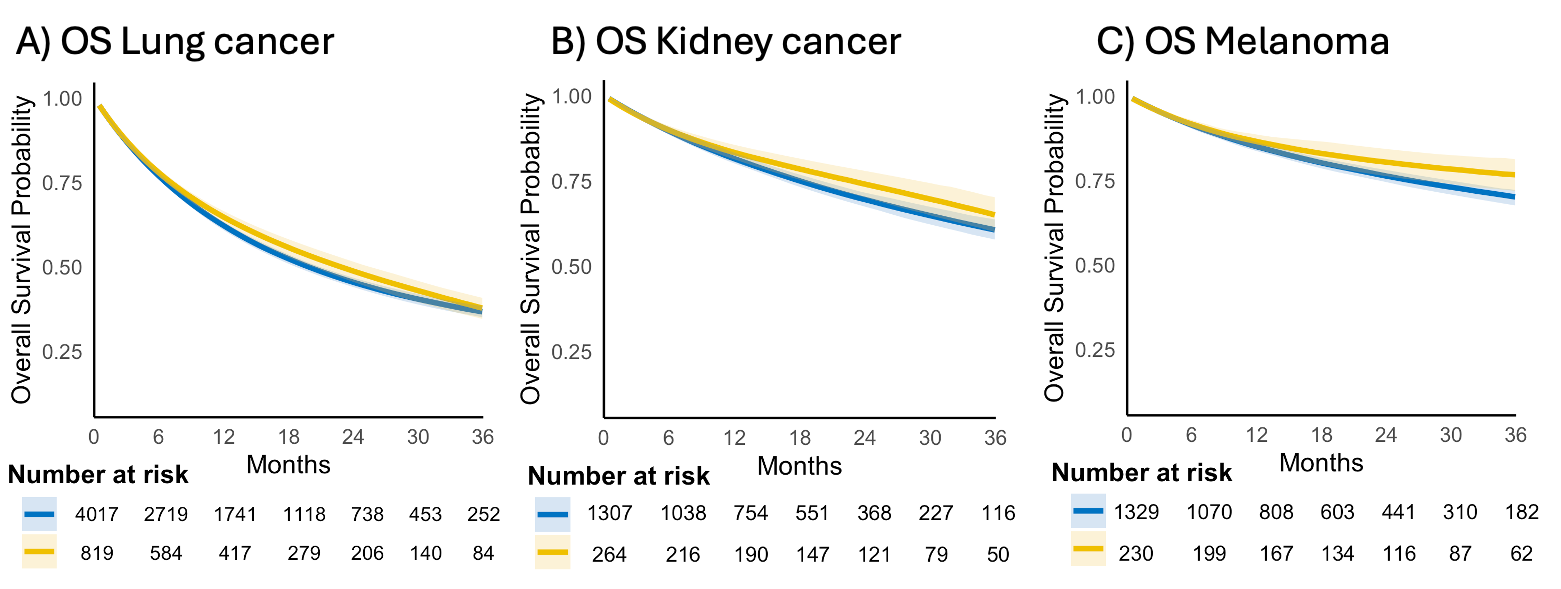


The outcomes included overall survival for A) lung cancer, B) kidney cancer, and C). The x-axis of each figure was the month since first-line ICI initiation. The curves were colored by the Flu vaccine initiation strategy within 100 days of ICI initiation (blue: no vaccine and yellow: vaccine). The overall survival probabilities were estimated in the target trial emulation. Shaded areas represented the 95% confidence intervals constructed using bootstrap with 500 replications. The number of participants at risk at each time point were listed below each figure.

**Extended Data Table 1. Description of a target randomized control trial and the corresponding trial emulation**

| **Study element** | **Target trial** | **Emulated trial (observational study)** |
| --- | --- | --- |
| **Eligibility criteria** | Diagnosed with three types of cancer (lung cancer, kidney cancer, and melanoma) before ICI initiation | Diagnosed with three types of cancer (lung cancer, kidney cancer, and melanoma) in TriNetX before ICI initiation between 2015-2024. |
| Received at least one dose of an ICI as part of first-line systemic therapy between 2020-09-02 and 2024-11-08. | Received at least one dose of an ICI as part of first-line systemic therapy between 2020-09-02 and 2024-11-08. |
| Age ≥ 18 at time of first-line ICI initiation date. | Age ≥ 18 at time of first-line ICI initiation date. |
| **Treatment strategies** | **Treatment arm**: Initiate a COVID-19 mRNA vaccine within 100-day of ICIa initiation.  **Control arm**: Do not initiate a COVID-19 mRNA vaccine within 100-day of ICI initiation. | **Treatment arm**b: Initiate a COVID-19 mRNA vaccine within −100 to +100 days of ICI initiation  **Control arm**: Do not initiate a COVID-19 mRNA vaccine during the interval −100 to +100 days from ICI initiation. |
| **Treatment assignment** | Time zero: ICI initiation.  Open label, randomized treatment assignment occurs at time zero. | Time zero: same.  Emulated randomizationc. |
| **Outcomes** | Primary: Overall survival time  Secondary: Treatment-free survival | Same. |
| **Follow-up** | Starts at randomized treatment assignment (time zero) and ends at death, end of clinical follow-up, or 2025-02-16, whichever occurs first. | Start at time zero and ends at date of death (as recorded in TriNetX Research Network), end of follow-up, or 2025-02-16, whichever occurs first. |
| **Causal contrast** | Intention-to-treat effect. | Observational analog of intention-to-treat effect. |
| **Statistical analysis** | Intention-to-treat effect analysis, accounting for censoring. | Intention-to-treat effect analysis, accounting for censoring and baseline confounding. |

a. ICI, Immune checkpoint inhibitors.

b. Vaccinations occurring −100 to 0 days are treated as baseline initiation, equivalent to day-0 initiation in the target trial. Vaccinations 0 to +100 days count as grace-period initiation.

c. Emulated randomization was achieved by cloning individuals and applying inverse probability of censoring weights (IPCW) to account for deviations from the assigned treatment strategy.

**Extended Data Table 2. List of query codes for cancer diagnoses, immunotherapy, chemotherapy, COVID-19 vaccination, influenza vaccination, and comorbidity index.**

| **Cancer Diagnosis** | | |
| --- | --- | --- |
| Lung cancer | ICD-10-CM: C34 | Malignant neoplasm of bronchus and lung |
| Melanoma | ICD-10-CM: C43 | Malignant melanoma of skin |
| Kidney cancer | ICD-10-CM: C64 | Renal cell carcinoma: Malignant neoplasm of kidney, except renal pelvis |
| **Immunotherapy** | | |
| Pembrolizumab | RxNorm:1547545 | Pembrolizumab |
|  | HCPCS: J9271 | Procedure: Injection, Pembrolizumab |
| Ipilimumab | RxNorm: 1094833 | Ipilimumab |
|  | HCPCS: J9228 | Procedure: Injection, Ipilimumab |
| Tremelimumab | RxNorm: 2619313 | Tremelimumab |
| Nivolumab | RxNorm: 1597876 | Nivolumab |
|  | HCPCS: J9299 | Procedure: Injection, Nivolumab |
| Cemiplimab | RxNorm: 2058826 | Cemiplimab |
|  | HCPCS: J9119 | Procedure: Injection, Cemiplimab |
| Dostarlimab | RxNorm: 2539967 | Dostarlimab |
|  | HCPCS: J9272 | Procedure: Injection, Dostarlimab |
| Atezolizumab | RxNorm: 1792776 | Atezolizumab |
|  | HCPCS: J9022 | Procedure: Injection, Atezolizumab |
| Avelumab | RxNorm: 1875534 | Avelumab |
|  | HCPCS: J9023 | Procedure: Injection, Avelumab |
| Durvalumab | RxNorm: 1919503 | Durvalumab |
|  | HCPCS: J9173 | Procedure: Injection, Durvalumab |
| Relatlimab | RxNorm: 2596773 | Relatlimab |
| **Covid 19 mRNA Vaccine** | | |
| Pfizer mRNA vaccine | CPT: 0001A-0004A, 0021A, 0022A, 0034A, 0051A-0054A, 0064A, 0071A-0074A, 0081A-0083A, 0091A-0094A, 91300, 91305, 91312, 91313, 91320, 91321  CVX: 208, 300  RxNorm: 2610319, 2610347, 2623382 | |
| Moderna mRNA vaccine | CPT: 0011A-0013A, 0104A, 0111A-0113A, 0124A, 0134A, 0144A, 0154A, 0164A, 91301, 91306, 91314, 91315, 91322  CVX: 207, 301  RxNorm: 2610328, 2623378 | |
| Other mRNA vaccine | CPT: 0031A, 0041A-0042A, 0044A, 0173A-0174A, 91302-91304, 91307-91311, 91316-91319  CVX: 210, 212, 213, 217-219, 221, 227-230, 302, 308, 309, 310-312, 500-520  ICD-10-PCS: XW013S6, XW013T6, XW013U6, XW013V7, XW013W7, XW023S6, XW023T6, XW023U6, XW023V7, XW023W7 | |
| **Flu Vaccine** | | |
| Flu vaccine | RxNorm: Z23; CPT: 90656, 90658, 90660, 90653, 90756 | |
| **Chemotherapy** | | |
| Cisplatin | RxNorm: 2555 |  |
| Carboplatin | RxNorm: 40048 |  |
| Pemetrexed | RxNorm: 68446 |  |
|  | HCPCS: J9305 |  |
| Paclitaxel | RxNorm: 56946 |  |
| Gemcitabine | RxNorm: 12574 |  |
|  | HCPCS: J9201 |  |
| Etoposide | RxNorm: 4179 |  |
| Irinotecan | RxNorm: 51499 |  |
| Methotrexate | RxNorm: 6851 |  |
| Vinblastine | RxNorm: 11198 |  |
| Doxorubicin | RxNorm: 3639 |  |
| Docetaxel | RxNorm: 72962 |  |
| 5-Fluorouracil | RxNorm: 4492 | Fluorouracil |
| Leucovorin | RxNorm: 6313 |  |
| Oxaliplatin | RxNorm: 32592 |  |
|  | HCPCS: J9263 |  |
| Capecitabine | RxNorm: 194000 |  |
| Dacarbazine | RxNorm: 3098 |  |
|  | HCPCS: J9130 |  |
| Temozolomide | RxNorm: 37776 |  |
| Floxuridine | RxNorm: 4488 |  |
|  | HCPCS: J9200 |  |
| Epirubicin | RxNorm: 3995 |  |
| Vinorelbine | RxNorm: 39541 |  |
|  | HCPCS: J9390 |  |
| Ifosfamide | RxNorm: 5657 |  |
| **Vascular Endothelial Growth Factor-Tyrosine Kinase Inhibitors (VEGF-TKI)** | | |
| Sunitinib | RxNorm: 357977 | |
| Pazopanib | RxNorm: 714438 | |
| Sorafenib | RxNorm: 1242999 | |
| Axitinib | RxNorm: 1363268 | |
| Cabozantinib | RxNorm: 1603296 | |
| Lenvatinib | RxNorm: 495881 | |
| Tivozanib | RxNorm: 2534233 | |
| **Charlson Comorbidity Index score** | | |
| Myocardial infarction | ICD-10: I21, I22, I25.2 | |
| Congestive heart failure | ICD-10: I50, I11.0, I13.0, I13.2 | |
| Peripheral vascular disease | ICD-10: I70, I71, I73.1, I73.9, I77.1 | |
| Cerebrovascular disease | ICD-10: I60–I69, G45 | |
| Dementia | ICD-10: F00–F03, G30 | |
| Chronic obstructive pulmonary disease | ICD-10: J40–J47, J60–J67 | |
| Connective tissue disease | ICD-10: M05, M06, M31.5, M32–M34, M35.1, M35.3, M36.0 | |
| Peptic ulcer disease | ICD-10: K25-K28 | |
| Liver disease (mild) | ICD-10: B18, K70.0–K70.3, K70.9, K71.3–K71.5, K73, K74.0–K74.2, K76.0 | |
| Diabetes mellitus | ICD-10: E10.9, E11.9, E13.9 | |
| Diabetes mellitus with end-organ damage | ICD-10: E10.2–E10.7, E11.2–E11.7, E13.2–E13.7 | |
| Hemiplegia | ICD-10: G81, G82 | |
| Chronic kidney disease (moderate to severe) | ICD-10: N18.4–N18.6, N19, I12.0, I13.1 | |
| Liver disease (moderate to severe) | ICD-10: K72.9, K76.6, K70.4, K71.1, K74.3–K74.6 | |
| Malignancy (metastatic) | ICD-10: C77-C80 | |
| Leukemia (included in solid cancer) | ICD-10: C91-C95 | |
| Lymphoma (included in solid cancer) | ICD-10: C81–C85, C88 | |
| Acquired immunodeficiency syndrome | ICD-10: B20-B22, B24, Z21 | |

**Extended Data Table 3: Patients baseline characteristics by cancer type and by vaccination arms**

|  | **Lung cancer** | | **Kidney cancer** | | **Melanoma** | |
| --- | --- | --- | --- | --- | --- | --- |
|  | No Vaccine  (N=4,554) | Vaccine  (N=282) | No Vaccine  (N=1,485) | Vaccine  (N=86) | No Vaccine  (N=1,469) | Vaccine  (N=90) |
| **Age at ICI initiation (mean (SD))a** | 63.83 (9.37) | 63.22 (9.15) | 61.10 (10.43) | 61.66 (9.35) | 58.65 (13.54) | 60.31 (11.63) |
| **Pandemic (2020-May, 2023), N (%)** | 3013 (66.2) | 254 (90.1) | 942 (63.4) | 76 (88.4) | 922 (62.8) | 79 (87.8) |
| **Male, N (%)** | 2509 (55.1) | 149 (52.8) | 1063 (71.6) | 67 (77.9) | 881 (60.0) | 53 (58.9) |
| **Race, N (%)** |  |  |  |  |  |  |
| **White** | 2430 (53.4) | 143 (50.7) | 786 (52.9) | 41 (47.7) | 983 (66.9) | 64 (71.1) |
| **Black** | 685 (15.0) | 54 (19.1) | 108 (7.3) | 5 (5.8) | 31 (2.1) | 1 (1.1) |
| **Asian and other** | 454 (10.0) | 24 (8.5) | 206 (13.9) | 15 (17.4) | 88 (6.0) | 5 (5.6) |
| **Unknown** | 985 (21.6) | 61 (21.6) | 385 (25.9) | 25 (29.1) | 367 (25.0) | 20 (22.2) |
| **Ethnicity, N (%)** |  |  |  |  |  |  |
| **Hispanic or Latino** | 142 (3.1) | 10 (3.5) | 157 (10.6) | 14 (16.3) | 42 (2.9) | 2 (2.2) |
| **Not Hispanic or Latino** | 3121 (68.5) | 185 (65.6) | 989 (66.6) | 53 (61.6) | 1124 (76.5) | 72 (80.0) |
| **Unknown** | 1291 (28.3) | 87 (30.9) | 339 (22.8) | 19 (22.1) | 303 (20.6) | 16 (17.8) |
| **Marital status, N (%)** |  |  |  |  |  |  |
| **Married** | 1429 (31.4) | 70 (24.8) | 584 (39.3) | 30 (34.9) | 594 (40.4) | 38 (42.2) |
| **Single** | 1431 (31.4) | 77 (27.3) | 424 (28.6) | 24 (27.9) | 396 (27.0) | 20 (22.2) |
| **Unknown** | 1694 (37.2) | 135 (47.9) | 477 (32.1) | 32 (37.2) | 479 (32.6) | 32 (35.6) |
| **CCI (mean (SD))b** | 8.88 (3.44) | 9.13 (3.35) | 8.24 (3.68) | 9.26 (2.98) | 7.69 (3.09) | 7.82 (2.86) |
| **Metastatic, N (%)** | 3488 (76.6) | 220 (78.0) | 1036 (69.8) | 74 (86.0) | 1108 (75.4) | 71 (78.9) |
| **Concurrent chemo, N (%)** | 2938 (64.5) | 174 (61.7) | 70 (4.7) | 2 (2.3) | 46 (3.1) | 1 (1.1) |
| **ICI type, N (%)c** |  |  |  |  |  |  |
| **Anti-PD1** | 3395 (74.5) | 225 (79.8) | 1457 (98.1) | 84 (97.7) | 1421 (96.7) | 89 (98.9) |
| **Anti-PDL1** | 1233 (27.1) | 60 (21.3) | 37 (2.5) | 2 (2.3) | 17 (1.2) | 1 (1.1) |
| **Vaccine timing, N (%)** |  |  |  |  |  |  |
| **Pre-index** | 0 (0.0) | 138 (48.9) | 0 (0.0) | 40 (46.5) | 0 (0.0) | 48 (53.3) |
| **Post-index** | 0 (0.0) | 144 (51.1) | 0 (0.0) | 46 (53.5) | 0 (0.0) | 42 (46.7) |
| **Vaccine brand, N (%)** |  |  |  |  |  |  |
| **Pfizer** | 0 (0.0) | 225 (79.8) | 0 (0.0) | 69 (80.2) | 0 (0.0) | 67 (74.4) |
| **Moderna** | 0 (0.0) | 105 (37.2) | 0 (0.0) | 42 (48.8) | 0 (0.0) | 42 (46.7) |
| **Vaccine shots in window, N (%)** |  |  |  |  |  |  |
| **1** | 0 (0.0) | 176 (62.4) | 0 (0.0) | 56 (65.1) | 0 (0.0) | 56 (62.2) |
| **2** | 0 (0.0) | 99 (35.1) | 0 (0.0) | 27 (31.4) | 0 (0.0) | 34 (37.8) |
| **3** | 0 (0.0) | 4 (1.4) | 0 (0.0) | 3 (3.5) | 0 (0.0) | 0 (0.0) |
| **4** | 0 (0.0) | 3 (1.1) | 0 (0.0) | 0 (0.0) | 0 (0.0) | 0 (0.0) |
| **Vaccine window, N (%)** |  |  |  |  |  |  |
| **-100 to -30** | 0 (0.0) | 94 (33.3) | 0 (0.0) | 34 (39.5) | 0 (0.0) | 24 (26.7) |
| **-30 to 0** | 0 (0.0) | 50 (17.7) | 0 (0.0) | 12 (14.0) | 0 (0.0) | 18 (20.0) |
| **0 to 30** | 0 (0.0) | 42 (14.9) | 0 (0.0) | 11 (12.8) | 0 (0.0) | 11 (12.2) |
| **30 to 100** | 0 (0.0) | 96 (34.0) | 0 (0.0) | 29 (33.7) | 0 (0.0) | 37 (41.1) |
| **Median follow up, mo (range)** | 20.1 (0, 53.1) | 32.9 (0.9, 49.4) | 20.9 (0, 53.0) | 34.7 (2.3, 49.9) | 21.3 (0, 53.1) | 36.2 (4.1, 51.2) |
| **Median OS, mo [95% CI]d** | 18.9 (17.5, 20.5) | 25.6 (20.5, 33.9) | NA (NA, NA) | NA (NA, NA) | NA (NA, NA) | NA (NA, NA) |

a. ICI: immune checkpoint inhibitor.

b. CCI: Charlson Comorbidity Index.

c. ICI type was defined as backbone anti-PD1 (Nivolumab, Pembrolizumab, Cemiplimab, or Dostarlimab), anti-PDL1 (Atezolizumab, Avelumab or Durvalumab).

d. The median OS cannot be calculated for kidney and melanoma cancer because the 50% survival rate has not reached.

**Extended Data Table 4. Unadjusted one-year, two-year and three-year restricted mean survival time difference (ΔRMST), risk ratio (RR) and hazard ratio (HR) for the vaccination vs no-vaccination strategy.**

| **Cancer Type** | **RMSTa Vax (mo)** | **RMST No-Vax (mo)** | **RMST Difference (mo)** | **P Valueb** | **Risk Vax** | **Risk No-Vax** | **Risk Ratio** | **P Valueb** | **Hazard Ratioc** | **P Valueb** |
| --- | --- | --- | --- | --- | --- | --- | --- | --- | --- | --- |
| **1-year Overall Survival** | | | | | | | | | | |
| **Lung** | 9.87 (9.44-10.31) | 9.35 (9.23-9.47) | 0.53 (0.08-0.97) | 0.022 | 0.32 (0.27-0.38) | 0.39 (0.38-0.41) | 0.82 (0.69-0.98) | 0.026 | - | - |
| **Kidney** | 11.06 (10.47-11.64) | 10.81 (10.66-10.97) | 0.25 (-0.36-0.85) | 0.423 | 0.12 (0.05-0.19) | 0.19 (0.16-0.21) | 0.65 (0.36-1.16) | 0.141 | - | - |
| **Melanoma** | 11.12 (10.61-11.63) | 11.02 (10.88-11.16) | 0.1 (-0.44-0.63) | 0.724 | 0.16 (0.08-0.24) | 0.15 (0.13-0.16) | 1.11 (0.68-1.81) | 0.668 | - | - |
| **1-year Treatment-free Survival** | | | | | | | | | | |
| **Lung** | 9.59 (9.15-10.03) | 8.93 (8.81-9.05) | **0.66 (0.21-1.12)** | **0.004** | 0.4 (0.34-0.45) | 0.47 (0.45-0.49) | 0.84 (0.73-0.97) | 0.021 | - | - |
| **Kidney** | 10.39 (9.71-11.06) | 10.33 (10.17-10.5) | 0.05 (-0.65-0.75) | 0.887 | 0.25 (0.16-0.35) | 0.29 (0.27-0.32) | 0.87 (0.6-1.27) | 0.478 | - | - |
| **Melanoma** | 11.07 (10.54-11.6) | 10.53 (10.37-10.7) | 0.53 (-0.02-1.09) | 0.057 | 0.16 (0.08-0.24) | 0.24 (0.21-0.26) | 0.68 (0.42-1.09) | 0.111 | - | - |
| **2-year Overall Survival** | | | | | | | | | | |
| **Lung** | 17.05 (16.01-18.08) | 15.56 (15.28-15.84) | **1.49 (0.42-2.56)** | **0.007** | 0.49 (0.43-0.55) | 0.56 (0.54-0.57) | 0.88 (0.78-1) | 0.041 | - | - |
| **Kidney** | 20.49 (19.05-21.94) | 19.83 (19.43-20.23) | 0.67 (-0.83-2.16) | 0.382 | 0.28 (0.18-0.38) | 0.3 (0.28-0.33) | 0.92 (0.65-1.3) | 0.632 | - | - |
| **Melanoma** | 20.77 (19.37-22.17) | 20.68 (20.31-21.05) | 0.09 (-1.35-1.54) | 0.900 | 0.23 (0.14-0.32) | 0.23 (0.21-0.26) | 0.99 (0.67-1.47) | 0.967 | - | - |
| **2-year Treatment-free Survival** | | | | | | | | | | |
| **Lung** | 15.85 (14.81-16.9) | 14 (13.72-14.27) | **1.86 (0.78-2.94)** | **0.001** | 0.57 (0.5-0.63) | 0.66 (0.64-0.67) | **0.86 (0.78-0.96)** | **0.005** | - | - |
| **Kidney** | 17.85 (16.13-19.58) | 17.8 (17.35-18.25) | 0.05 (-1.73-1.83) | 0.954 | 0.44 (0.33-0.55) | 0.45 (0.42-0.48) | 0.98 (0.77-1.25) | 0.884 | - | - |
| **Melanoma** | 20.31 (18.89-21.74) | 18.73 (18.29-19.16) | 1.59 (0.1-3.08) | 0.037 | 0.28 (0.18-0.38) | 0.38 (0.35-0.41) | 0.75 (0.53-1.04) | 0.087 | - | - |
| **3-year Overall Survival** | | | | | | | | | | |
| **Lung** | 22.61 (20.93-24.28) | 20.3 (19.85-20.76) | **2.3 (0.57-4.04)** | **0.009** | 0.59 (0.52-0.66) | 0.66 (0.63-0.68) | 0.9 (0.82-1) | 0.048 | 0.81 (0.69-0.96) | 0.017 |
| **Kidney** | 28.72 (26.21-31.22) | 27.56 (26.86-28.27) | 1.15 (-1.45-3.76) | 0.386 | 0.38 (0.26-0.49) | 0.42 (0.38-0.46) | 0.9 (0.68-1.19) | 0.457 | 0.83 (0.56-1.22) | 0.338 |
| **Melanoma** | 29.71 (27.3-32.12) | 29.54 (28.89-30.2) | 0.16 (-2.33-2.66) | 0.897 | 0.3 (0.19-0.4) | 0.29 (0.26-0.32) | 1.03 (0.74-1.43) | 0.851 | 1.02 (0.67-1.53) | 0.943 |
| **3-year Treatment-free Survival** | | | | | | | | | | |
| **Lung** | 20.58 (18.91-22.25) | 17.49 (17.06-17.93) | **3.09 (1.36-4.82)** | **<0.001** | 0.66 (0.6-0.73) | 0.76 (0.74-0.78) | **0.87 (0.8-0.95)** | **0.002** | **0.78 (0.66-0.91)** | **0.002** |
| **Kidney** | 23.91 (21.04-26.78) | 23.68 (22.92-24.45) | 0.23 (-2.74-3.2) | 0.880 | 0.54 (0.43-0.66) | 0.58 (0.54-0.62) | 0.94 (0.77-1.14) | 0.508 | 0.93 (0.68-1.28) | 0.667 |
| **Melanoma** | 28.36 (25.87-30.85) | 25.68 (24.93-26.43) | 2.68 (0.08-5.28) | 0.043 | 0.38 (0.27-0.49) | 0.46 (0.42-0.49) | 0.83 (0.63-1.09) | 0.175 | 0.77 (0.54-1.1) | 0.147 |

a. RMST: Restricted Mean Survival Time.

b. Significance was determined by Bonferroni corrected alpha at 0.017. Significant results were bolded.

c**.** Hazard ratios were estimated from Cox regression models throughout follow-up

**Extended Data Table 5. Adjusted restricted mean survival time difference (ΔRMST) and risk ratio (RR) for the vaccination vs no-vaccination strategy across cancer types estimated from the target trial emulation at one-, two- and three-years.**

| **Cancer Type** | **RMSTa Vax (mo)** | **RMST No-Vax (mo)** | **RMST Difference (mo)** | **P Valueb** | **Risk Vax** | **Risk No-Vax** | **Risk Ratio** | **P Valueb** |
| --- | --- | --- | --- | --- | --- | --- | --- | --- |
| **3-year Overall Survivalc** | | | | | | | | |
| **Lung** | 22.95 (22.03-23.76) | 20.62 (20.29-20.97) | **2.33 (1.41-3.23)** | **<0.001** | 0.55 (0.5-0.6) | 0.64 (0.62-0.65) | **0.86 (0.79-0.94)** | **0.004** |
| **Kidney** | 29.29 (28.12-30.65) | 27.74 (27.24-28.24) | **1.55 (0.33-2.89)** | **0.018** | 0.3 (0.23-0.38) | 0.39 (0.37-0.42) | 0.77 (0.58-0.97) | 0.020 |
| **Melanoma** | 29.79 (28.51-31.2) | 29.52 (29.05-29.98) | 0.26 (-1.08-1.55) | 0.740 | 0.28 (0.2-0.35) | 0.29 (0.27-0.31) | 0.95 (0.7-1.21) | 0.748 |
| **3-year Treatment Free Survivalc** | | | | | | | | |
| **Lung** | 21.04 (20.1-22.09) | 17.83 (17.5-18.17) | **3.21 (2.21-4.22)** | **<0.001** | 0.64 (0.59-0.69) | 0.74 (0.73-0.75) | **0.87 (0.8-0.93)** | **<0.001** |
| **Kidney** | 25.57 (23.79-27.25) | 23.98 (23.43-24.54) | 1.59 (-0.24-3.22) | 0.096 | 0.48 (0.39-0.58) | 0.56 (0.53-0.58) | 0.87 (0.7-1.04) | 0.16 |
| **Melanoma** | 28 (26.54-29.56) | 25.73 (25.19-26.28) | **2.26 (0.62-4.05)** | **0.018** | 0.38 (0.28-0.46) | 0.46 (0.43-0.48) | 0.82 (0.61-1) | 0.048 |
| **2-year Overall Survivalc** | | | | | | | | |
| **Lung** | 16.94 (16.51-17.33) | 15.75 (15.56-15.97) | **1.19 (0.76-1.59)** | **<0.001** | 0.45 (0.42-0.49) | 0.55 (0.53-0.56) | **0.83 (0.76-0.9)** | **<0.001** |
| **Kidney** | 20.5 (19.97-21.08) | 19.9 (19.63-20.19) | 0.6 (0.06-1.16) | 0.032 | 0.23 (0.18-0.28) | 0.3 (0.28-0.32) | **0.78 (0.61-0.95)** | **0.004** |
| **Melanoma** | 20.79 (20.21-21.38) | 20.67 (20.41-20.91) | 0.11 (-0.48-0.67) | 0.696 | 0.22 (0.16-0.27) | 0.23 (0.21-0.25) | 0.95 (0.72-1.2) | 0.716 |
| **2-year Treatment Free Survivalc** | | | | | | | | |
| **Lung** | 16.07 (15.62-16.57) | 14.25 (14.04-14.46) | **1.82 (1.35-2.32)** | **<0.001** | 0.53 (0.48-0.57) | 0.65 (0.64-0.66) | **0.81 (0.74-0.87)** | **<0.001** |
| **Kidney** | 18.81 (17.96-19.59) | 18.03 (17.71-18.36) | 0.78 (-0.09-1.53) | 0.068 | 0.39 (0.32-0.46) | 0.44 (0.42-0.47) | 0.87 (0.72-1.04) | 0.14 |
| **Melanoma** | 20.02 (19.36-20.71) | 18.81 (18.48-19.11) | **1.21 (0.47-1.93)** | **0.008** | 0.29 (0.22-0.36) | 0.38 (0.36-0.4) | **0.77 (0.59-0.96)** | **0.012** |
| **1-year Overall Survivalc** | | | | | | | | |
| **Lung** | 9.67 (9.56-9.77) | 9.41 (9.33-9.51) | **0.26 (0.17-0.34)** | **<0.001** | 0.33 (0.31-0.35) | 0.38 (0.37-0.39) | **0.86 (0.81-0.91)** | **<0.001** |
| **Kidney** | 10.88 (10.74-11.01) | 10.82 (10.71-10.92) | 0.06 (-0.04-0.16) | 0.232 | 0.16 (0.13-0.18) | 0.18 (0.17-0.2) | 0.87 (0.75-1) | 0.048 |
| **Melanoma** | 11.02 (10.88-11.15) | 11 (10.9-11.1) | 0.02 (-0.09-0.14) | 0.684 | 0.14 (0.12-0.17) | 0.15 (0.14-0.16) | 0.97 (0.81-1.15) | 0.688 |
| **1-year Treatment Free Survivalc** | | | | | | | | |
| **Lung** | 9.49 (9.37-9.59) | 9.02 (8.94-9.11) | **0.46 (0.37-0.56)** | **<0.001** | 0.36 (0.34-0.38) | 0.45 (0.44-0.46) | **0.81 (0.76-0.85)** | **<0.001** |
| **Kidney** | 10.57 (10.4-10.73) | 10.35 (10.23-10.46) | **0.22 (0.08-0.35)** | **<0.001** | 0.23 (0.2-0.27) | 0.27 (0.25-0.28) | 0.87 (0.75-1.01) | 0.068 |
| **Melanoma** | 10.87 (10.73-11.01) | 10.54 (10.43-10.65) | **0.32 (0.19-0.44)** | **<0.001** | 0.18 (0.15-0.2) | 0.23 (0.22-0.25) | **0.76 (0.63-0.89)** | **0.004** |

a. RMST: Restricted Mean Survival Time.

b. Significance was determined by Bonferroni corrected alpha at 0.017. Significant results were bolded.

c. All results were estimated from pooled logistic regression for all patients using inverse probability of censoring weights.

**Extended Data Table 6. Variation in ICI Treatments Between Vaccinated and Unvaccinated Groups by Cancer Type.**

|  |  | Overall | No vaccine | Vaccine | P value |
| --- | --- | --- | --- | --- | --- |
| Lung | N | 4836 | 4554 | 282 |  |
| Anti-PD1 mono, N (%) | 3272 (67.7) | 3070 (67.4) | 202 (71.6) | 0.160 |
| Anti-PDL1 mono, N (%) | 1211 (25.0) | 1154 (25.3) | 57 (20.2) | 0.063 |
| Anti-PD1+chemo, N (%) | 2109 (43.6) | 1989 (43.7) | 120 (42.6) | 0.759 |
| Anti-PDL1+chemo, N (%) | 867 (17.9) | 820 (18.0) | 47 (16.7) | 0.625 |
| Kidney | N | 1571 | 1485 | 86 |  |
| Anti-PD1 mono, N (%) | 1102 (70.1) | 1047 (70.5) | 55 (64.0) | 0.242 |
| Anti-PDL1 mono, N (%) | 30 (1.9) | 28 (1.9) | 2 (2.3) | 1.000 |
| Anti-PD1+Ipilimumab, N (%) | 426 (27.1) | 397 (26.7) | 29 (33.7) | 0.196 |
| Nivolumab mono, N (%) | 282 (18.0) | 261 (17.6) | 21 (24.4) | 0.143 |
| Nivolumab+Ipilimumab, N (%) | 426 (27.1) | 397 (26.7) | 29 (33.7) | 0.196 |
| VEGF-TKIa, N (%) | 654 (41.6) | 609 (41.0) | 45 (52.3) | 0.050 |
| Melanoma | N | 1559 | 1469 | 90 |  |
| Anti-PD1 mono, N (%) | 890 (57.1) | 836 (56.9) | 54 (60.0) | 0.642 |
| Nivolumab mono, N (%) | 334 (21.4) | 308 (21.0) | 26 (28.9) | 0.100 |
| Anti-PD1+Ipilimumab, N (%) | 588 (37.7) | 555 (37.8) | 33 (36.7) | 0.921 |
| Nivolumab+Ipilimumab, N (%) | 583 (37.4) | 550 (37.4) | 33 (36.7) | 0.972 |

1. VEGF-TKI: vascular endothelial growth factor-tyrosine kinase inhibitors, including Sunitinib, Pazopanib,Sorafenib, Axitinib, Cabozantinib, Lenvatinib, and Tivozanib
